# Supplementary material for: Optogenetic activation of heterotrimeric G-proteins by LOV2GIVe, a rationally engineered modular protein
Source: eLife. 2020 Sep 16;9:e60155. doi: 10.7554/eLife.60155 (PMC7515630; doi:10.7554/eLife.60155)
Supplement: Figure 2—figure supplement 1—source data 1. [file elife-60155-fig2-figsupp1-data1.xlsx]

## Sheet: Figure 2- supp 1
Construct	1	2	3	Replicate #
LOV2GIVe (L +FA)	200.373	173.294	180.582
LOV2GIVe (L)	156.734	141.109	144.438
LOV2GIVe (D)	145.91	140.584	136.089
