# Supplementary material for: Optogenetic activation of heterotrimeric G-proteins by LOV2GIVe, a rationally engineered modular protein
Source: eLife. 2020 Sep 16;9:e60155. doi: 10.7554/eLife.60155 (PMC7515630; doi:10.7554/eLife.60155)
Supplement: Figure 2—source data 1. [file elife-60155-fig2-data1.xlsx]

## Sheet: Figure 2A
	LOV2GIVe (L)			LOV2GIVe (D)
[Gai3]	1	2	3	1	2	3	Replicate #
0	0	0	0	0	0	0
0.025	3.91304	2.18182	1.85714	0	0	0
0.05	21.7391	13	6.42857	0	0	0
0.1	40.9565	36.3636	29.6429	0	0	0
0.25	57.8261	64.5455	53.5714	0.782609	0.545455	0.142857
0.5	80.1739	70	79.2857	1.30435	0.636364	1.07143
1	88.2609	91.8182	99.7143	2.3913	1.81818	1.71429
2	95.6522	100.454	95.3571	15	13.6364	6.92857
