# Supplementary material for: Optogenetic activation of heterotrimeric G-proteins by LOV2GIVe, a rationally engineered modular protein
Source: eLife. 2020 Sep 16;9:e60155. doi: 10.7554/eLife.60155 (PMC7515630; doi:10.7554/eLife.60155)
Supplement: Figure 2—source data 2. [file elife-60155-fig2-data2.xlsx]

## Sheet: Figure 2C
	LOV2GIVe (L)		LOV2GIVe (D)
[LOV2GIVe]	1	2	1	2	Replicate #
0	100	100	100	100
0.1	115	106	106	103
0.25	121	122	112	105
0.5	132	140	106	109
1	169	165	113	112
2	202	187	125	123
