# Supplementary material for: Optogenetic activation of heterotrimeric G-proteins by LOV2GIVe, a rationally engineered modular protein
Source: eLife. 2020 Sep 16;9:e60155. doi: 10.7554/eLife.60155 (PMC7515630; doi:10.7554/eLife.60155)
Supplement: Figure 3—figure supplement 1—source data 1. [file elife-60155-fig3-figsupp1-data1.xlsx]

## Sheet: Figure 3- supp 1
	"No antagonist"			"+ 300 uM Atropine"
log [Carbachol] (M)	1	2	3	1	2	3	Replicate #
"- infinity"	0	0	0	0	0	0
-7	5.51409	2.61234	1.21858
-6.52288	1.83549	4.85149	6.0853
-6	16.5346	21.211	17.1668
-5.52288	24.4021	25.4912	26.8317
-5	46.1538	63.4501	59.2993
-4.52288	72.6504	87.342	82.9931
-4	80.7845	107.007	91.1043	-6.09292	3.59482	10.4494
-3.52288	83.0465	105.872	101.097	-1.9802	7.2658	4.76009
