# Supplementary material for: Optogenetic activation of heterotrimeric G-proteins by LOV2GIVe, a rationally engineered modular protein
Source: eLife. 2020 Sep 16;9:e60155. doi: 10.7554/eLife.60155 (PMC7515630; doi:10.7554/eLife.60155)
Supplement: Figure 3—figure supplement 2—source data 1. [file elife-60155-fig3-figsupp2-data1.xlsx]

## Sheet: Figure 3- supp 2
Construct	1	2	3	4	5	Replicate #
mLOV2GIVe (L) (wt)	8.19	6.279	4.922	5.625	7.599
mLOV2GIVe (L) (FA)	1.238	-0.677	-1.463	-0.036	0.159
mLOV2GIVe (wt) (wt)	1.651	-1.934	-0.747	1.829	0.032
mLOV2GIVe (wt) (FA)	4.518	1.618	-6.083	1.048	1.877
