# Supplementary material for: Optogenetic activation of heterotrimeric G-proteins by LOV2GIVe, a rationally engineered modular protein
Source: eLife. 2020 Sep 16;9:e60155. doi: 10.7554/eLife.60155 (PMC7515630; doi:10.7554/eLife.60155)
Supplement: Figure 3—figure supplement 3—source data 1. [file elife-60155-fig3-figsupp3-data1.xlsx]

## Sheet: Figure 3- supp 3A
	"No isoproterenol stim"				"No mLOV2GIVe (L)"				"+ 0.5 ug mLOV2GIVe (L)"				"+ 2.0 ug mLOV2GIVe (L)"
Time (s)	1	2	3	4	1	2	3	4	1	2	3	4	1	2	3	4	Repicalte#
0	0.982025	0.983733	0.990794	0.99095	0.980985	0.976318	0.989822	0.991739	0.984295	0.976637	0.978547	0.994006	0.986157	0.974891	0.988946	0.991179
5	0.995697	0.997797	0.998289	1.00073	0.995191	0.999416	0.999612	0.998184	1.0017	1.00232	0.997657	0.998694	1.00051	0.999431	1.00117	0.996933
10	0.996065	0.996452	1.00162	0.999995	0.995989	0.999108	0.998514	1.00527	1.00164	1.00089	1.00069	0.996909	0.997645	0.997693	1.00124	1.001
15	0.99902	0.998226	0.999723	0.998405	1.00142	0.997756	1.00311	1.00123	0.994776	0.998252	0.998448	1.00019	0.999887	0.997757	0.998871	0.998741
20	0.998033	1.0005	1.00293	1.00042	0.996727	1.00158	1.00279	0.994861	0.998693	1.00173	0.999438	0.998575	0.998952	0.998787	0.999846	0.999304
25	0.998835	0.997491	1.00339	0.998832	1.00385	0.996346	1.00117	0.998124	1.00101	0.994414	1.00328	0.999589	1.00095	0.99596	0.999777	1.00037
30	0.999638	1.00284	0.999266	0.997794	1.00136	0.997511	0.998128	1.00147	0.996824	0.999925	0.998712	1.00174	0.997086	1.00299	1.00117	1.00181
35	1.00019	1.00204	1.00064	1.00245	0.999008	1.00114	0.995942	1.00422	1.00101	1.00245	0.998909	0.999888	0.996094	0.999431	1.00117	0.998616
40	1.00224	1.00031	0.99907	0.996819	1.00223	0.997143	1.00149	0.996973	1.00038	1.00115	0.999768	1.00198	1.0007	1.00267	0.999428	0.999804
45	1.00205	1.00204	0.997053	1.00461	1.00124	1.00306	0.999612	1.00367	1.00289	0.999281	1.00402	0.998277	1.00226	1.00053	0.997619	1.00106
50	1.00436	1.00297	1.00083	0.997733	0.999688	1.00127	0.996263	0.998669	0.999568	0.999732	0.998975	1.00049	1.0027	1.00124	0.998871	1.00005
55	1.00386	0.99933	0.997183	1.00221	1.00329	1.00567	1.00337	0.997336	1.00151	0.999861	1.0001	1.00367	1.00321	1.00351	1.00082	1.00231
60	1.0068	1.00118	0.999723	1.00049	1.01662	1.0153	1.01999	1.00718	1.02694	1.02058	1.02034	1.0158	1.0331	1.02892	1.02122	1.0192
65	1.00567	1.00093	0.999723	0.996941	1.02585	1.02164	1.02113	1.01577	1.03923	1.03034	1.02359	1.03107	1.04839	1.03761	1.02855	1.02614
70	1.00511	1.00433	0.996599	0.999872	1.03512	1.03144	1.02799	1.02336	1.05564	1.03411	1.03324	1.03702	1.06329	1.05687	1.03899	1.03808
75	1.00674	1.00427	0.995303	0.999321	1.03525	1.04265	1.03355	1.02234	1.06607	1.0435	1.04164	1.04459	1.07593	1.06685	1.05319	1.04679
80	1.0053	1.00019	1.00057	0.996576	1.04348	1.04285	1.04009	1.03087	1.07395	1.05206	1.04734	1.05854	1.08865	1.07784	1.06098	1.05572
85	1.00605	1.00576	0.999136	1.00134	1.04734	1.04844	1.04177	1.03255	1.08541	1.06069	1.05715	1.06331	1.09919	1.09044	1.0685	1.06544
90	1.0058	1.00501	0.996404	1.00517	1.05363	1.04392	1.04353	1.04277	1.09703	1.06755	1.06153	1.07101	1.11147	1.09623	1.07774	1.06943
95	1.00405	0.999146	0.996923	1.00178	1.05521	1.05533	1.0443	1.04284	1.10984	1.07592	1.06347	1.07721	1.12364	1.10665	1.08286	1.07491
100	1.00423	1.00825	1.00123	1.00871	1.06068	1.0619	1.04983	1.05178	1.11363	1.07659	1.07085	1.08181	1.13142	1.11509	1.08821	1.0841
105	1.00875	1.00377	0.996923	1.00517	1.06383	1.06357	1.05255	1.05347	1.12239	1.08685	1.07695	1.08723	1.14215	1.12604	1.09486	1.08491
110	1.00655	1.00732	0.997378	1.00178	1.06671	1.07009	1.05571	1.05434	1.13298	1.09963	1.07903	1.08701	1.15275	1.13329	1.1021	1.09188
115	1.00749	1.00869	0.999005	1.00715	1.0728	1.07491	1.05456	1.05394	1.13418	1.1001	1.08444	1.09219	1.16187	1.13963	1.10576	1.09645
120	1.00536	1.00969	0.999592	1.00529	1.07695	1.0805	1.05896	1.05814	1.14393	1.09305	1.08725	1.09591	1.16805	1.14528	1.11401	1.09985
125	1.00768	1.00819	1.00247	1.00622	1.07789	1.07406	1.06472	1.05842	1.15284	1.10567	1.09212	1.10162	1.17431	1.1497	1.11513	1.10679
130	1.00667	1.00284	0.999136	1.00678	1.07853	1.07849	1.06546	1.06895	1.15276	1.10756	1.09047	1.10723	1.18456	1.15623	1.12247	1.10863
135	1.00837	1.0052	1.00175	1.00771	1.0828	1.08774	1.06781	1.06958	1.16351	1.11097	1.09433	1.11076	1.19072	1.16099	1.11853	1.11017
140	1.01254	1.00526	1.00057	1.00399	1.08579	1.08825	1.06995	1.07034	1.16546	1.11753	1.0995	1.11209	1.20054	1.15978	1.12573	1.11506
145	1.01121	1.00994	1.00379	1.01133	1.08447	1.09568	1.06885	1.06819	1.1687	1.11585	1.10207	1.11224	1.20171	1.16782	1.13151	1.11795
150	1.00957	1.00869	1.00064	1.00728	1.08945	1.09361	1.06899	1.0744	1.17523	1.1152	1.10586	1.11751	1.2097	1.17136	1.13375	1.1229
155	1.01254	1.00607	1.0011	1.00659	1.08871	1.09568	1.07292	1.0668	1.17722	1.12117	1.1091	1.11885	1.21687	1.17483	1.13671	1.1192
160	1.01001	1.00396	1.00051	1.00871	1.08666	1.09346	1.07576	1.07363	1.17992	1.12654	1.10756	1.12359	1.21965	1.17894	1.13969	1.12797
165	1.00862	1.00427	1.00247	1.00989	1.09424	1.09991	1.07952	1.07517	1.18333	1.13007	1.11155	1.12654	1.22506	1.1793	1.14051	1.12845
170	1.01355	1.00582	1.00116	1.00833	1.09203	1.10689	1.07456	1.07927	1.18368	1.13007	1.11073	1.12382	1.22806	1.18182	1.14461	1.13133
175	1.01553	1.00994	1.00083	1.01002	1.09685	1.10103	1.07982	1.07715	1.18887	1.13163	1.10886	1.1205	1.23365	1.18535	1.14543	1.13213
180	1.01311	1.01139	1.00696	1.00678	1.09417	1.10508	1.07749	1.07998	1.19145	1.13254	1.11073	1.12875	1.22986	1.18508	1.14828	1.13334
185	1.01197	1.01448	0.999136	1.0134	1.09781	1.10471	1.08072	1.0814	1.18985	1.1323	1.11482	1.13172	1.23784	1.18735	1.15253	1.13061
190	1.01273	1.00988	1.00287	1.01246	1.09946	1.10366	1.07944	1.08168	1.19465	1.13945	1.11327	1.13142	1.24371	1.19284	1.14855	1.1381
195	1.01419	1.01227	0.997963	1.00896	1.10133	1.11205	1.07869	1.0809	1.19573	1.13403	1.12086	1.13303	1.24149	1.19173	1.14828	1.1364
200	1.01349	1.00875	1.00051	1.01265	1.1045	1.10644	1.0805	1.0854	1.19923	1.14146	1.11705	1.13587	1.24457	1.19164	1.15225	1.14373
205	1.01266	1.00951	1.00025	1.01058	1.10216	1.11243	1.07959	1.08454	1.19725	1.14381	1.11598	1.1328	1.24787	1.19661	1.14975	1.14332
210	1.01534	1.01328	0.99907	1.01593	1.10013	1.10576	1.08611	1.08655	1.20094	1.13786	1.12094	1.1368	1.24661	1.19754	1.15429	1.13883
215	1.01515	1.01816	1.00005	1.01271	1.10276	1.10825	1.0808	1.08705	1.19716	1.1397	1.11746	1.13472	1.25246	1.19357	1.15699	1.13543
220	1.01451	1.01467	1.00254	1.01328	1.10096	1.09909	1.08208	1.0814	1.20284	1.14373	1.12177	1.13356	1.25119	1.20098	1.15671	1.14438
225	1.01483	1.01095	1.00247	1.01196	1.10284	1.09954	1.08269	1.08154	1.19635	1.13945	1.11796	1.13487	1.25728	1.19689	1.15699	1.14644
230	1.01668	1.00669	1.00168	1.0124	1.10246	1.10396	1.08163	1.08432	1.20085	1.14533	1.12194	1.1385	1.25187	1.19588	1.15858	1.14545
235	1.01451	1.01277	1.00458	1.01618	1.10299	1.10856	1.0852	1.08218	1.20375	1.13995	1.12169	1.1385	1.25403	1.1956	1.1568	1.14332
240	1.01693	1.01107	1.00142	1.01202	1.10905	1.10396	1.08239	1.08569	1.20202	1.145	1.12302	1.13595	1.25688	1.20359	1.16055	1.14373
245	1.01693	1.0129	1.00504	1.01656	1.10209	1.10659	1.08474	1.08806	1.20565	1.14121	1.1262	1.13912	1.25639	1.19671	1.15765	1.14447
250	1.01706	1.01829	1.00097	1.02005	1.10495	1.09546	1.08649	1.08784	1.20157	1.14247	1.12136	1.13081	1.25266	1.19986	1.15924	1.14883
255	1.02046	1.01581	1.00438	1.01783	1.10126	1.10719	1.08262	1.0903	1.20112	1.13836	1.12545	1.13912	1.25955	1.20042	1.15905	1.14234
260	1.02053	1.01001	1.00372	1.01719	1.10058	1.1041	1.08642	1.09131	1.19725	1.13744	1.12069	1.13088	1.25314	1.20116	1.15867	1.14324
265	1.01598	1.01855	1.0055	1.01732	1.10563	1.10388	1.08299	1.08626	1.20112	1.1402	1.12654	1.13641	1.25629	1.20005	1.16102	1.14168
270	1.01989	1.01505	1.00201	1.01296	1.1051	1.10682	1.08657	1.08712	1.1995	1.13853	1.12069	1.13881	1.25777	1.19884	1.15886	1.14701
275	1.01445	1.01664	0.997703	1.01586	1.10261	1.10396	1.08848	1.08662	1.20094	1.13702	1.12528	1.13943	1.25609	1.20079	1.1598	1.14545
280	1.0215	1.02149	1.00445	1.01296	1.10013	1.10029	1.08665	1.08741	1.20103	1.13744	1.12344	1.13188	1.25314	1.19865	1.15774	1.14875
285	1.01681	1.00732	1.0055	1.02255	1.10096	1.1075	1.08231	1.08461	1.19986	1.1318	1.12244	1.13618	1.25649	1.20144	1.16159	1.14611
290	1.01963	1.01347	1.00689	1.01548	1.10261	1.10841	1.08383	1.08734	1.20239	1.14137	1.12461	1.13541	1.25836	1.20359	1.15811	1.13989
295	1.0237	1.02104	1.0032	1.01479	1.10246	1.10373	1.0894	1.08683	1.20148	1.1347	1.12595	1.13533	1.25403	1.19874	1.16366	1.14217
300	1.02156	1.01804	1.00195	1.0141	1.10518	1.10051	1.07703	1.08518	1.2022	1.13561	1.11829	1.1341	1.25472	1.19763	1.16272	1.14594
305	1.02092	1.01645	1.00643	1.01872	1.10314	1.10667	1.08512	1.08784	1.19815	1.13995	1.12069	1.13387	1.25266	1.19569	1.1555	1.14062
310	1.0177	1.01435	1.00682	1.01536	1.10352	1.10133	1.08307	1.0859	1.20329	1.13412	1.12261	1.13188	1.25266	1.19902	1.16102	1.14095
315	1.02111	1.0141	1.00735	1.01757	1.10344	1.10667	1.08368	1.08648	1.20511	1.1323	1.12394	1.13188	1.25738	1.2006	1.16177	1.1425
320	1.02448	1.01505	1.00623	1.01884	1.10088	1.10576	1.08543	1.09589	1.19689	1.13387	1.11994	1.13502	1.25275	1.19385	1.15858	1.14348
325	1.02318	1.01759	1.00908	1.01942	1.09566	1.10283	1.0814	1.08497	1.19403	1.13188	1.12136	1.1331	1.25324	1.19837	1.15596	1.14201
330	1.02014	1.01931	1.00842	1.02351	1.10141	1.10088	1.08178	1.08827	1.19492	1.1347	1.12219	1.13027	1.25413	1.1956	1.15914	1.13965
335	1.0248	1.01372	1.00313	1.01707	1.09603	1.09354	1.08649	1.08892	1.19959	1.13106	1.12086	1.12875	1.24293	1.19532	1.15578	1.13965
340	1.02053	1.0213	1.00842	1.0198	1.09811	1.10096	1.08148	1.0844	1.19797	1.1342	1.12419	1.12905	1.24972	1.19865	1.15541	1.13924
345	1.0204	1.02053	1.00656	1.02159	1.10374	1.09798	1.08088	1.08993	1.19555	1.13246	1.11837	1.13149	1.25364	1.19412	1.15606	1.13551
350	1.02292	1.02336	1.00928	1.017	1.10148	1.09612	1.08299	1.09095	1.19887	1.1318	1.12202	1.13742	1.24933	1.19339	1.15746	1.136
355	1.025	1.01982	1.01188	1.01821	1.09886	1.10667	1.08497	1.08806	1.1918	1.12974	1.11787	1.12798	1.25197	1.19091	1.15774	1.14013
360	1.02623	1.01727	1.0051	1.02376	1.09841	1.09243	1.07666	1.08813	1.19626	1.12719	1.12019	1.12654	1.25011	1.18817	1.15475	1.13624
365	1.02636	1.022	1.00768	1.02095	1.09759	1.09221	1.07929	1.08863	1.19349	1.129	1.12194	1.12306	1.24516	1.18489	1.15466	1.13503
370	1.02486	1.02232	1.00603	1.02114	1.09826	1.09731	1.07974	1.08583	1.19421	1.12336	1.11912	1.1292	1.24342	1.1889	1.1569	1.13584
375	1.025	1.01759	1.00975	1.02127	1.10073	1.0982	1.07967	1.08619	1.19671	1.13147	1.11713	1.13257	1.24072	1.18571	1.15392	1.13125
380	1.02617	1.02536	1.00795	1.02364	1.09939	1.09768	1.08299	1.08734	1.19555	1.12777	1.11754	1.12791	1.24062	1.18417	1.15429	1.13029
385	1.02227	1.01931	1.00935	1.01916	1.09528	1.09368	1.07906	1.09153	1.18967	1.12646	1.11961	1.12997	1.24139	1.18453	1.15596	1.13406
390	1.02643	1.01461	1.01222	1.02287	1.09566	1.09228	1.08436	1.08619	1.19653	1.12523	1.11887	1.12791	1.24158	1.18498	1.15373	1.13908
395	1.02747	1.01893	1.00995	1.02146	1.09946	1.09768	1.07779	1.08375	1.18623	1.12157	1.12127	1.1245	1.23517	1.18508	1.14994	1.12869
400	1.02904	1.01931	1.00735	1.02287	1.09121	1.09295	1.07809	1.08511	1.18614	1.1236	1.11622	1.13088	1.23641	1.18326	1.15188	1.13173
405	1.02747	1.0167	1.00828	1.02421	1.09558	1.09016	1.08072	1.08533	1.18755	1.12036	1.11532	1.12434	1.2327	1.18417	1.15095	1.13254
410	1.02806	1.02258	1.00948	1.02364	1.10043	1.08979	1.07816	1.08332	1.18834	1.11882	1.11606	1.12586	1.24033	1.18209	1.15271	1.13037
415	1.02793	1.02361	1.00326	1.02589	1.09543	1.09464	1.08042	1.08705	1.18324	1.11737	1.11721	1.12178	1.2291	1.18426	1.15457	1.13479
420	1.03042	1.02769	1.00868	1.02486	1.09424	1.0914	1.08345	1.0854	1.18658	1.11818	1.11376	1.12374	1.23336	1.17966	1.15169	1.13005
425	1.0276	1.02691	1.00768	1.02479	1.0921	1.09486	1.0833	1.08318	1.18587	1.12157	1.11098	1.1254	1.23346	1.17474	1.15077	1.13463
430	1.03088	1.02162	1.01262	1.0264	1.08908	1.08738	1.07771	1.08218	1.18482	1.11963	1.12036	1.11773	1.22967	1.17777	1.14966	1.12766
435	1.02917	1.02316	1.01015	1.02012	1.0924	1.09805	1.07531	1.08154	1.1835	1.11786	1.11057	1.12502	1.22769	1.17643	1.15169	1.13366
440	1.02852	1.02175	1.00908	1.02344	1.09143	1.08789	1.07673	1.08055	1.18508	1.12222	1.11245	1.11848	1.23127	1.17545	1.1436	1.13294
445	1.03187	1.03153	1.01302	1.02165	1.09677	1.08753	1.07937	1.08225	1.18271	1.12182	1.1122	1.12028	1.22403	1.17216	1.14672	1.13342
450	1.03075	1.01746	1.01618	1.02544	1.09536	1.09398	1.07666	1.08197	1.17809	1.11018	1.10951	1.12306	1.22637	1.17136	1.14745	1.13133
455	1.03451	1.02021	1.01369	1.0277	1.09048	1.08709	1.06929	1.08019	1.18552	1.11177	1.11787	1.1193	1.22581	1.16924	1.14324	1.12654
460	1.03075	1.02213	1.00901	1.02737	1.08937	1.08701	1.07711	1.08261	1.17722	1.11464	1.1122	1.11572	1.2275	1.16677	1.14306	1.12774
465	1.02898	1.0229	1.00948	1.02396	1.09033	1.0917	1.07801	1.07828	1.17575	1.1101	1.11376	1.11915	1.22731	1.17154	1.14434	1.12909
470	1.03385	1.02905	1.01108	1.02964	1.0836	1.08129	1.07494	1.07616	1.1774	1.11649	1.11008	1.12156	1.22712	1.16694	1.14051	1.12734
475	1.03272	1.02971	1.01262	1.02421	1.09077	1.0917	1.07472	1.08218	1.17696	1.11625	1.11057	1.12088	1.22319	1.17563	1.14516	1.12148
480	1.0361	1.02529	1.01382	1.02679	1.09114	1.08614	1.0811	1.08297	1.17853	1.11931	1.10683	1.12095	1.22525	1.16563	1.14443	1.13213
485	1.03923	1.02445	1.00901	1.03003	1.08695	1.09324	1.07554	1.07856	1.1742	1.11312	1.10918	1.11624	1.22188	1.16712	1.14006	1.12401
490	1.0351	1.02374	1.01322	1.0329	1.09085	1.09258	1.07531	1.08518	1.17497	1.10986	1.11008	1.1115	1.22048	1.16039	1.14278	1.12243
495	1.03424	1.02769	1.01315	1.03427	1.08952	1.08723	1.07322	1.0819	1.17007	1.11312	1.10902	1.11699	1.22422	1.16756	1.14033	1.12909
500	1.0363	1.02265	1.01396	1.03166	1.09048	1.08302	1.07884	1.07828	1.16921	1.10827	1.11302	1.11498	1.21909	1.16624	1.14124	1.12646
505	1.03497	1.02529	1.01048	1.0314	1.08411	1.08891	1.07824	1.08097	1.17084	1.11448	1.10796	1.11759	1.21567	1.16361	1.14051	1.1244
510	1.03676	1.02704	1.01503	1.02984	1.08783	1.08869	1.07188	1.07906	1.16767	1.11328	1.10602	1.11468	1.21742	1.16256	1.13979	1.13189
515	1.0379	1.02762	1.01295	1.03094	1.08761	1.07913	1.07914	1.08247	1.17067	1.11217	1.10959	1.11372	1.21826	1.16082	1.13825	1.12195
520	1.0387	1.03284	1.01376	1.0288	1.08754	1.0857	1.07479	1.07969	1.17178	1.10954	1.10764	1.11453	1.21401	1.16213	1.13897	1.1248
525	1.0403	1.0333	1.01591	1.03329	1.08542	1.08418	1.07412	1.08119	1.17092	1.1093	1.10829	1.11364	1.21456	1.16187	1.13789	1.12195
530	1.03716	1.0229	1.01282	1.03094	1.08886	1.08057	1.06914	1.08382	1.16622	1.10449	1.11065	1.11475	1.2153	1.15787	1.13536	1.12329
535	1.03683	1.02529	1.01699	1.02828	1.08302	1.08753	1.07501	1.07941	1.16435	1.10606	1.11024	1.11327	1.21254	1.163	1.13969	1.12022
540	1.03843	1.02413	1.01423	1.03264	1.08827	1.08928	1.07055	1.08026	1.16401	1.10962	1.10943	1.11372	1.20742	1.15804	1.13743	1.12385
545	1.03856	1.02258	1.01382	1.03179	1.08316	1.08331	1.06818	1.07757	1.16393	1.10425	1.10473	1.11438	1.20642	1.1577	1.13662	1.12156
550	1.0353	1.02873	1.01841	1.03309	1.0844	1.08818	1.07374	1.07856	1.16537	1.11121	1.1061	1.11105	1.20678	1.15822	1.13419	1.12535
555	1.03537	1.02769	1.01463	1.03035	1.08813	1.0823	1.067	1.08055	1.15828	1.10606	1.10336	1.1076	1.20352	1.15952	1.13383	1.12766
560	1.0383	1.02931	1.01767	1.03703	1.08476	1.08556	1.06973	1.0804	1.16351	1.10772	1.10497	1.10833	1.20842	1.15778	1.13294	1.12038
565	1.03916	1.02704	1.00875	1.0348	1.08805	1.07892	1.0687	1.08012	1.1624	1.10496	1.10223	1.10987	1.20126	1.15623	1.13843	1.11834
570	1.04252	1.02866	1.02058	1.03394	1.086	1.086	1.0733	1.07546	1.15912	1.10693	1.10626	1.11283	1.20596	1.16065	1.13707	1.12519
575	1.04117	1.03357	1.01503	1.03756	1.08747	1.0805	1.07092	1.07998	1.15861	1.1037	1.10287	1.11231	1.19982	1.15176	1.13852	1.12266
580	1.03803	1.02704	1.01202	1.0348	1.08258	1.08505	1.06899	1.08612	1.15861	1.10347	1.09935	1.11372	1.1982	1.15649	1.13222	1.1167
585	1.03783	1.0299	1.01571	1.0346	1.08447	1.07385	1.06781	1.07792	1.15727	1.10206	1.11073	1.10987	1.20027	1.15649	1.13097	1.12069
590	1.04157	1.0286	1.01382	1.03499	1.08244	1.08057	1.06848	1.07877	1.15844	1.10922	1.10416	1.11201	1.20009	1.15115	1.13106	1.11568
595	1.04144	1.03095	1.01726	1.03251	1.07781	1.08086	1.07107	1.07913	1.15693	1.10496	1.09711	1.11068	1.19856	1.14698	1.13366	1.11795
600	1.04272	1.0316	1.01895	1.03558	1.08353	1.08804	1.07129	1.07835	1.15534	1.10284	1.09751	1.10877	1.20261	1.15021	1.13276	1.11623
605	1.04359	1.022	1.01841	1.03303	1.08229	1.07556	1.06995	1.07693	1.1587	1.10104	1.10319	1.11091	1.1924	1.14842	1.13097	1.12077
610	1.04292	1.03607	1.01686	1.03408	1.08273	1.08476	1.06803	1.0819	1.15777	1.09645	1.10263	1.10716	1.18869	1.15133	1.13213	1.11763
615	1.04562	1.0284	1.01868	1.03388	1.08295	1.07727	1.07233	1.08168	1.15019	1.10041	1.10255	1.10936	1.19677	1.14936	1.12999	1.11522
620	1.0371	1.02458	1.01977	1.0369	1.08447	1.07328	1.0733	1.07771	1.15234	1.09917	1.10279	1.10892	1.19785	1.14791	1.13124	1.12093
625	1.04575	1.03396	1.01625	1.03552	1.08055	1.08028	1.06862	1.0787	1.15752	1.10057	1.0991	1.10234	1.19303	1.14757	1.12839	1.12187
630	1.04144	1.03528	1.0174	1.03789	1.0828	1.08317	1.06744	1.08275	1.15143	1.10464	1.10014	1.11135	1.18772	1.14825	1.13142	1.11623
635	1.04063	1.03607	1.01801	1.03901	1.07745	1.08309	1.07136	1.08247	1.14986	1.10575	1.09974	1.10811	1.18833	1.14791	1.12644	1.11529
640	1.04339	1.03733	1.02065	1.03961	1.08027	1.07285	1.06862	1.07828	1.14779	1.10073	1.10231	1.10198	1.18684	1.14384	1.1275	1.11732
645	1.04406	1.02464	1.01423	1.03716	1.0799	1.07827	1.06173	1.07941	1.15035	1.10018	1.10207	1.10256	1.18728	1.14393	1.12768	1.11482
650	1.04346	1.03075	1.01726	1.04027	1.07925	1.08201	1.06803	1.0775	1.15143	1.10182	1.09831	1.10635	1.18631	1.1446	1.1252	1.1192
655	1.05024	1.02931	1.01584	1.03611	1.08135	1.0823	1.07255	1.07588	1.14812	1.10112	1.09919	1.11164	1.18526	1.14435	1.12494	1.11195
660	1.0405	1.03232	1.0149	1.03743	1.07638	1.07363	1.06818	1.08176	1.14928	1.10245	1.09919	1.10708	1.1815	1.14919	1.12821	1.11467
665	1.04535	1.03686	1.0178	1.03545	1.08063	1.07784	1.07107	1.08005	1.14221	1.09536	1.09719	1.1062	1.18561	1.14207	1.12821	1.11631
670	1.04616	1.02194	1.0151	1.03657	1.0828	1.0762	1.06877	1.08055	1.14961	1.10096	1.09902	1.10774	1.17906	1.14553	1.12089	1.1203
675	1.04238	1.03627	1.01659	1.03664	1.08244	1.07906	1.06502	1.07998	1.14878	1.10339	1.09974	1.10401	1.18324	1.14486	1.1283	1.11048
680	1.04935	1.03376	1.01369	1.03828	1.08229	1.08158	1.06892	1.07899	1.14262	1.09575	1.10255	1.10482	1.18728	1.14384	1.12821	1.10848
685	1.0405	1.04098	1.01773	1.03473	1.07781	1.07763	1.06627	1.07693	1.14335	1.09722	1.0995	1.10314	1.1788	1.14486	1.12335	1.11072
690	1.0467	1.03726	1.01753	1.03961	1.0794	1.08014	1.0659	1.07799	1.14606	1.09536	1.09775	1.10212	1.17941	1.14562	1.12019	1.11102
695	1.04616	1.02853	1.01679	1.04193	1.08041	1.0787	1.06848	1.07658	1.14565	1.10112	1.09632	1.10833	1.17845	1.14148	1.12361	1.11889
700	1.04352	1.02697	1.01895	1.04073	1.07659	1.07527	1.06774	1.07962	1.14107	1.09878	1.09687	1.10811	1.17898	1.13955	1.12608	1.11141
705	1.04853	1.03357	1.02092	1.0424	1.08142	1.07563	1.06546	1.07969	1.14516	1.09893	1.09767	1.10613	1.17898	1.13737	1.11984	1.1125
710	1.04976	1.03311	1.01997	1.03486	1.08099	1.07999	1.07107	1.07764	1.14058	1.098	1.10095	1.10555	1.17586	1.14014	1.12001	1.10587
715	1.04785	1.03825	1.01909	1.0424	1.07702	1.0752	1.06752	1.08168	1.14082	1.09971	1.09711	1.10533	1.17431	1.14039	1.12326	1.11203
720	1.04643	1.03746	1.02038	1.04073	1.08019	1.07292	1.06789	1.07927	1.13717	1.0987	1.09608	1.10299	1.17889	1.14156	1.11661	1.11041
725	1.05085	1.03653	1.01834	1.0373	1.07717	1.07456	1.0648	1.07955	1.14197	1.09421	1.09871	1.10826	1.17603	1.14039	1.11993	1.11033
730	1.0469	1.02581	1.02242	1.0424	1.08193	1.07627	1.06744	1.07877	1.14614	1.09197	1.09465	1.10452	1.17491	1.14249	1.11731	1.1125
735	1.04643	1.03245	1.02031	1.04014	1.08019	1.08317	1.06605	1.07799	1.1396	1.10166	1.09902	1.10394	1.17319	1.13629	1.1215	1.11172
740	1.04616	1.03912	1.0197	1.04027	1.08106	1.07677	1.06597	1.08347	1.13993	1.10323	1.09584	1.10336	1.1713	1.13729	1.11574	1.11599
745	1.04514	1.03534	1.02133	1.04073	1.07882	1.07992	1.06649	1.07821	1.13636	1.09847	1.09966	1.1035	1.16823	1.13955	1.12194	1.10994
750	1.04656	1.03449	1.02004	1.04053	1.08012	1.07627	1.06862	1.07595	1.13969	1.09405	1.09608	1.10082	1.17096	1.13746	1.11827	1.11195
755	1.05359	1.03416	1.01929	1.04193	1.07745	1.07221	1.07144	1.07969	1.13985	1.10057	1.09212	1.10547	1.16968	1.13329	1.11975	1.11312
760	1.0467	1.036	1.02338	1.0438	1.07466	1.07441	1.06686	1.0809	1.13346	1.09948	1.09584	1.10365	1.165	1.1393	1.11202	1.11475
765	1.05024	1.03799	1.02072	1.04661	1.07774	1.08194	1.06502	1.0763	1.13668	1.10331	1.09497	1.10256	1.16737	1.13396	1.11774	1.1101
770	1.05188	1.03766	1.0214	1.04748	1.07933	1.07913	1.06966	1.07771	1.1392	1.09925	1.09425	1.09995	1.16754	1.13371	1.11809	1.10963
775	1.04813	1.03049	1.02065	1.04346	1.0794	1.07563	1.06671	1.08268	1.14262	1.0932	1.09624	1.10416	1.1661	1.13595	1.11818	1.11374
780	1.04779	1.04058	1.02236	1.04607	1.07702	1.07598	1.0684	1.07686	1.1333	1.09529	1.09433	1.10075	1.15951	1.13462	1.11765	1.11358
785	1.04751	1.03819	1.02242	1.04193	1.07796	1.07985	1.06202	1.0839	1.13434	1.09784	1.09031	1.10329	1.15951	1.13271	1.12062	1.10894
790	1.04867	1.04231	1.02441	1.04506	1.08027	1.08028	1.06013	1.07708	1.13539	1.09637	1.09346	1.10482	1.16635	1.1388	1.11739	1.10863
795	1.04881	1.03528	1.02229	1.0418	1.07998	1.08701	1.07062	1.08019	1.12834	1.09715	1.09417	1.10431	1.16305	1.13346	1.11531	1.10979
800	1.04616	1.03772	1.02072	1.04714	1.08034	1.08476	1.07107	1.08076	1.13265	1.09854	1.09173	1.10089	1.16491	1.13437	1.11696	1.11288
