# Supplementary material for: Optogenetic activation of heterotrimeric G-proteins by LOV2GIVe, a rationally engineered modular protein
Source: eLife. 2020 Sep 16;9:e60155. doi: 10.7554/eLife.60155 (PMC7515630; doi:10.7554/eLife.60155)
Supplement: Figure 3—figure supplement 3—source data 2. [file elife-60155-fig3-figsupp3-data2.xlsx]

## Sheet: Figure 3- supp 3B
Condition:	"No isoproterenol stim"				"No mLOV2GIVe (L)"				"+ mLOV2GIVe (L)"				"+ mLOV2GIVe (L + FA)"				"+ mLOV2GIVe (D)"
	1	2	3	4	1	2	3	4	1	2	3	4	1	2	3	4	1	2	3	4	Repicalte#
	1.01878	1.01554	1.00332	1.00532	1.1035	1.10349	1.08502	1.09327	1.25588	1.20006	1.15937	1.16261	1.14569	1.13339	1.14293	1.14047	1.15076	1.14846	1.12829	1.13099
