# Supplementary material for: Optogenetic activation of heterotrimeric G-proteins by LOV2GIVe, a rationally engineered modular protein
Source: eLife. 2020 Sep 16;9:e60155. doi: 10.7554/eLife.60155 (PMC7515630; doi:10.7554/eLife.60155)
Supplement: Figure 3—source data 1. [file elife-60155-fig3-data1.xlsx]

## Sheet: Figure 3A
Construct	1	2	3	Replicate #
-	6.91667	10.4	13.65
LOV2GIVe (D)	12.7111	11.1389	11.7278
LOV2GIVe (L)	14.9889	20.5889	19.1611
LOV2GIVe wt	11.8444	12.5333	6.03889
mLOV2GIVe (D)	142.6	204.75	104.6
mLOV2GIVe (L)	4167.4	5389.95	6659.2
mLOV2GIVe wt	105.9	129.05	181.1
