# Supplementary material for: Optogenetic activation of heterotrimeric G-proteins by LOV2GIVe, a rationally engineered modular protein
Source: eLife. 2020 Sep 16;9:e60155. doi: 10.7554/eLife.60155 (PMC7515630; doi:10.7554/eLife.60155)
Supplement: Figure 3—source data 2. [file elife-60155-fig3-data2.xlsx]

## Sheet: Figure 3B
	LOV2GIVe (L)			LOV2GIVe (D)			M4 + agonist control
Amount of LOV2GIV	1	2	3	1	2	3	1	2	3	Replicate #
0	0	0	0	0	0	0
0.25	4.672	4.075	2.2	-0.27	1.918	-0.93
0.5	7.683	4.739	4.209	0.54	1.285	0.249
1	8.824	7.427	6.284	0.198	2.566	-0.0065
2	13.437	11.166	8.01	-0.82	0.578	0.368
							15.804	14.962	7.593
