# Supplementary material for: Optogenetic activation of heterotrimeric G-proteins by LOV2GIVe, a rationally engineered modular protein
Source: eLife. 2020 Sep 16;9:e60155. doi: 10.7554/eLife.60155 (PMC7515630; doi:10.7554/eLife.60155)
Supplement: Figure 4—source data 1. [file elife-60155-fig4-data1.xlsx]

## Sheet: Figure 4A
Time (s)	mLOV2GIVe WT	mLOV2GIVe FA
0	-0.165784	-0.227547
0.24	-0.12674	-0.125882
0.48	-0.060123	-0.0374061
0.72	-0.00889136	0.0668793
0.96	0.0268684	0.166352
1.2	0.0455978	0.211168
1.44	0.00384286	0.150987
1.68	0.043432	0.127379
1.92	-0.0265528	0.00865641
2.16	0.0235013	-0.0913259
2.4	0.0287563	-0.16733
2.64	-0.0963953	-0.152328
2.88	-0.139534	-0.200413
3.12	-0.205729	-0.192818
3.36	-0.190517	-0.178021
3.6	-0.189558	-0.0838257
3.84	-0.134372	-0.0925716
4.08	-0.0519481	-3.17156e-05
4.32	0.0525628	0.0127841
4.56	0.139143	-0.0107776
4.8	0.175321	-0.0872336
5.04	0.159981	-0.110119
5.28	0.123724	-0.180049
5.52	-0.00527185	-0.1308
5.76	-0.0776658	-0.124041
6	-0.0815662	-0.0586145
6.24	-0.0206004	-0.0334117
6.48	0.0746879	0.0183142
6.72	0.0882983	-0.0339655
6.96	0.0729147	0.0254984
7.2	0.00930649	0.0434191
7.44	-0.0462307	0.0254229
7.68	-0.0657113	0.0739729
7.92	-0.15262	0.1385
8.16	-0.108252	0.142417
8.4	-0.0774022	0.146954
8.64	-0.023571	0.217192
8.88	0.0117385	0.0875273
9.12	-0.0592463	-0.0369725
9.36	-0.0284433	0.0765753
9.6	0.00481905	0.0741278
9.84	-0.0159861	0.0389483
10.08	0.0801134	0.0129483
10.32	0.0708191	0.0227245
10.56	0.166624	0.0357231
10.8	0.189873	0.0273445
11.04	0.0786611	0.10187
11.28	0.0995485	0.0328261
11.52	0.178077	-0.0318629
11.76	0.13655	-0.0378667
12	0.0714875	-0.0906406
12.24	0.0493727	-0.0644485
12.48	0.113725	0.0116261
12.72	0.024074	0.00554685
12.96	-0.029039	0.0100177
13.2	-0.0818182	-0.0135907
13.44	-0.125325	0.0341389
13.68	-0.200338	-0.0246676
13.92	-0.155554	-0.0610489
14.16	-0.0829351	-0.0622154
14.4	-0.0432597	-0.100902
14.64	0.034619	0.0196214
14.88	0.0774203	0.188101
15.12	0.0719035	0.149718
15.36	0.0235745	0.127261
15.6	0.0203844	0.025462
15.84	0.0424602	-0.0707301
16.08	-0.00787531	-0.185881
16.32	0.0402567	-0.186077
16.56	0.0454325	-0.208497
16.8	0.0186706	-0.27266
17.04	-0.00841429	-0.162562
17.28	-0.0406788	-0.112297
17.52	-0.127289	-0.0402881
17.76	-0.159231	-0.0386089
18	-0.221281	-0.0375217
18.24	-0.1135	-0.0129249
18.48	-0.0908005	-0.0328923
18.72	-0.063203	0.0413259
18.96	-0.0544866	0.034827
19.2	0.0225372	-0.035779
19.44	-0.00546928	0.00321398
19.68	-0.0514671	-0.0220065
19.92	-0.0806554	0.0633221
20.16	0.0705329	0.0373268
20.4	0.158197	0.0664028
20.64	0.108018	-0.022083
20.88	0.061048	-0.0933231
21.12	0.0688684	-0.0186797
21.36	-0.0431251	0.0222667
21.6	-0.108772	0.038234
21.84	-0.0774255	0.0613305
22.08	0.0351074	0.0350601
22.32	0.0624818	0.0914042
22.56	0.081839	0.0797026
22.8	0.0728867	0.116379
23.04	0.0626997	0.0323646
23.28	-0.00402543	0.0527888
23.52	0.0900598	0.10194
23.76	0.0585157	0.107605
24	0.0349598	0.026565
24.24	0.0614759	-0.0505725
24.48	0.130478	-0.0594872
24.72	0.1462	-0.0451049
24.96	0.125762	-0.0508289
25.2	0.038697	-0.0182834
25.44	0.12252	0.117628
25.68	-0.0527316	0.193689
25.92	-0.0840212	0.209222
26.16	-0.06369	0.0983785
26.4	0.0192861	0.0603879
26.64	0.0339117	-0.0106471
26.88	0.0879446	-0.00992446
27.12	0.099984	0.0247469
27.36	0.171424	0.0737865
27.6	0.0748524	0.058042
27.84	0.1359	0.135571
28.08	0.0501576	0.239207
28.32	0.027703	0.19718
28.56	-0.0435221	0.0942191
28.8	-0.00588574	0.0358042
29.04	-0.205178	-0.0908858
29.28	-0.19543	-0.0997436
29.52	0.0323165	-0.0642657
29.76	0.340639	-0.0761772
40.08	0.542308	-0.104173
40.32	0.73626	-0.0883916
40.56	0.884463	0.0268298
40.8	0.970416	0.00398601
41.04	0.772957	0.0142657
41.28	0.777026	0
41.52	0.836593	0
41.76	0.850966	0
42	0.967286	0
42.24	0.99945	0
42.48	1.0017	0
42.72	0.994862	0
42.96	0.959537	0
43.2	0.921442	0
43.44	0.831485	0
43.68	0.793217	0
43.92	0.860489	0
44.16	0.768585	0
44.4	0.74326	0
44.64	0.736074	0
44.88	0.648931	0
45.12	0.649364	0
45.36	0.57997	0
45.6	0.56932	0
45.84	0.614342	0
46.08	0.518455	0
46.32	0.614385	0
46.56	0.734515	0
46.8	0.770446	0
47.04	0.827805	0
47.28	0.84313	0
47.52	0.800576	0
47.76	0.786204	0
48	0.731398	0
48.24	0.721009	0
48.48	0.670273	0
48.72	0.606593	0
48.96	0.581312	0.0134266
49.2	0.638671	-0.052028
49.44	0.55971	-0.0520746
49.68	0.601874	0.035641
49.92	0.682004	0.101958
50.16	0.620792	0.206387
50.4	0.616204	0.222051
50.64	0.689883	0.233963
50.88	0.728931	0.252947
51.12	0.765727	0.252113
51.36	0.691528	0.154178
51.6	0.641615	0.0862863
51.84	0.61326	0.0828037
52.08	0.530706	0.164608
52.32	0.575814	0.160207
52.56	0.623779	0.19777
52.8	0.590706	0.134763
53.04	0.614992	0.109849
53.28	0.622004	0.110511
53.52	0.602567	0.0884821
53.76	0.602654	0.116435
54	0.556463	0.161424
54.24	0.48603	0.165157
54.48	0.464429	0.125274
54.72	0.377242	-0.0551832
54.96	0.434385	-0.0634629
55.2	0.634481	-0.12316
55.44	0.612691	-0.166232
55.68	0.656057	-0.135286
55.92	0.719081	-0.118223
56.16	0.733884	0.0285231
56.4	0.725834	0.0740662
56.64	0.635754	0.124584
56.88	0.649098	0.0504354
57.12	0.641234	-0.0383478
57.36	0.448584	0.0489249
57.6	0.424948	0.00858089
57.84	0.517849	0.0195403
58.08	0.541269	-0.0190517
58.32	0.525944	0.0149156
58.56	0.512221	-0.0122639
58.8	0.471009	-0.0348093
59.04	0.439883	-0.0236662
59.28	0.476333	-0.0191534
59.52	0.48352	0.00406712
59.76	0.585857	0.0405566
60	0.597416	0.00277575
60.24	0.526853	-0.0155142
60.48	0.489061	-0.0591459
60.72	0.450922	0.0326629
60.96	0.537286	-0.033724
61.2	0.5701	-0.0496354
61.44	0.627589	-0.0852345
61.68	0.751321	-0.100303
61.92	0.710786	-0.0637296
62.16	0.571425	-0.070979
62.4	0.469514	-0.158275
62.64	0.419252	-0.19035
62.88	0.433453	-0.130117
63.12	0.359433	-0.0320047
63.36	0.459184	0.0434032
63.6	0.537901	0.00969696
63.84	0.596766	-0.0779953
64.08	0.613	-0.118591
64.32	0.591095	-0.0959758
64.56	0.546636	-0.144563
64.8	0.517243	-0.204866
65.04	0.460576	-0.183691
65.28	0.406117	-0.172531
65.52	0.295338	-0.19453
65.76	0.338585	-0.115099
66	0.323346	-0.096731
66.24	0.275944	-0.0135282
66.48	0.27352	0.0449054
66.72	0.418714	0.127912
66.96	0.539407	0.163558
67.2	0.520662	0.228467
67.44	0.516939	0.228151
67.68	0.535641	0.155565
67.92	0.440662	0.0666378
68.16	0.382091	0.0612998
68.4	0.364169	0.0653231
68.64	0.362178	0.100666
68.88	0.353346	0.0454163
69.12	0.374135	0.0291189
69.36	0.370656	0.0424653
69.6	0.391252	0.0234219
69.84	0.364492	-0.0151599
70.08	0.335702	-0.00609325
70.32	0.350552	-0.0303413
70.56	0.33849	-0.0199646
70.8	0.309438	-0.0252839
71.04	0.308923	-0.0767888
71.28	0.24986	-0.107036
71.52	0.350117	-0.0942387
71.76	0.370163	-0.136863
72	0.325797	-0.192323
72.24	0.353167	-0.215848
72.48	0.425217	-0.207509
72.72	0.412966	-0.133546
72.96	0.356154	-0.0207534
73.2	0.370182	-0.0139096
73.44	0.316345	-0.02418
73.68	0.265637	-0.00927181
73.92	0.132962	-0.0439842
74.16	0.103282	-0.091793
74.4	0.202962	-0.0533977
74.64	0.264988	-0.150903
74.88	0.33483	-0.22171
75.12	0.440962	-0.172088
75.36	0.431609	-0.187001
75.6	0.456429	-0.272349
75.84	0.437771	-0.256534
76.08	0.392085	-0.227616
76.32	0.35281	-0.158609
76.56	0.291721	-0.00539208
76.8	0.306697	0.129937
77.04	0.326059	0.128301
77.28	0.269817	0.163625
77.52	0.267393	0.193056
77.76	0.315289	0.0981333
78	0.202233	-0.0279403
78.24	0.247852	-0.0623963
78.48	0.292354	-0.0853436
78.72	0.329765	-0.167194
78.96	0.306839	-0.0977958
79.2	0.211684	-0.0692606
79.44	0.282778	-0.0804774
79.68	0.322879	0.00629089
79.92	0.3392	0.00307505
80.16	0.382345	-0.0563049
80.4	0.425494	-0.0317408
80.64	0.420302	-0.0598573
80.88	0.321237	-0.0611823
81.12	0.200968	-0.112082
81.36	0.198111	-0.130096
81.6	0.216432	-0.151378
81.84	0.317618	-0.0724317
82.08	0.327962	-0.0513455
82.32	0.371089	-0.102595
82.56	0.416299	-0.111766
82.8	0.340533	-0.0760224
83.04	0.306343	-0.143953
83.28	0.228881	-0.215771
83.52	0.201078	-0.277911
83.76	0.242933	-0.323468
84	0.339741	-0.252675
84.24	0.320977	-0.129006
84.48	0.286936	-0.106353
84.72	0.277185	-0.0536681
84.96	0.333195	-0.0623021
85.2	0.219831	-0.0457054
85.44	0.178684	-0.123458
85.68	0.221401	-0.213556
85.92	0.237118	-0.271795
86.16	0.214538	-0.256806
86.4	0.22795	-0.319057
86.64	0.261411	-0.291524
86.88	0.279132	-0.262116
87.12	0.119465	-0.180158
87.36	0.119066	-0.13537
87.6	0.135556	-0.0508056
87.84	0.0678182	-0.0510574
88.08	0.111866	-0.0288187
88.32	0.235351	-0.0196299
88.56	0.300481	0.00461258
88.8	0.355654	-0.0673734
89.04	0.379537	-0.0995189
89.28	0.453779	-0.126283
89.52	0.41287	-0.162759
89.76	0.386346	-0.1813
90	0.247753	-0.233654
90.24	0.201291	-0.26136
90.48	0.12857	-0.369057
90.72	0.0444771	-0.427599
90.96	0.0233515	-0.396213
91.2	0.0232303	-0.371524
91.44	0.0463303	-0.271113
91.68	0.0740035	-0.142931
91.92	0.0914386	-0.117095
92.16	0.183532	-0.00733243
92.4	0.329505	0.0360988
92.64	0.393343	0.0869986
92.88	0.362889	-0.0982928
93.12	0.359943	-0.248493
93.36	0.321856	-0.22316
93.6	0.206009	-0.246247
93.84	0.168386	-0.253823
94.08	0.149117	-0.202727
94.32	0.134502	-0.170443
94.56	0.0902477	-0.0154779
94.8	0.0683104	0.11704
95.04	0.133882	0.13656
95.28	0.199072	0.0950732
95.52	0.321068	-0.00152261
95.76	0.388291	0.0130275
96	0.381362	-0.0698863
96.24	0.321728	-0.17066
96.48	0.223236	-0.230879
96.72	0.14423	-0.265439
96.96	0.159782	-0.192101
97.2	0.126397	-0.182381
97.44	0.224592	-0.242199
97.68	0.182155	-0.22537
97.92	0.165195	-0.372554
98.16	0.20799	-0.260886
98.4	0.159576	-0.187249
98.64	0.226765	-0.148788
98.88	0.20652	-0.154745
99.12	0.196078	-0.0736681
99.36	0.237939	-0.0151226
99.6	0.196433	-0.0466508
99.84	0.220524	-0.108432
100.08	0.201291	-0.101872
100.32	0.183128	-0.162683
100.56	0.202308	-0.0583012
100.8	0.0224615	-0.0973735
101.04	-0.0679736	-0.135974
101.28	-0.0570493	-0.123233
101.52	-0.0699216	-0.114488
101.76	-0.0601922	-0.156483
102	-0.00132423	-0.139066
102.24	0.144238	-0.127775
102.48	0.211613	-0.104461
102.72	0.191871	-0.138526
102.96	0.204743	-0.14806
103.2	0.299537	-0.210848
103.44	0.202492	-0.232834
103.68	0.137065	-0.241259
103.92	0.117141	-0.333183
104.16	0.151343	-0.332876
104.4	0.110994	-0.260927
104.64	0.117078	-0.23461
104.88	0.100275	-0.248796
105.12	0.158771	-0.211528
105.36	0.0820935	-0.168213
105.6	0.0852299	-0.160227
105.84	0.0244398	-0.1413
106.08	0.0307195	-0.0583301
106.32	0.0315052	-0.10964
106.56	0.0632758	-0.0996504
106.8	0.0403017	-0.12042
107.04	0.118657	-0.108065
107.28	0.0785208	-0.167669
107.52	0.168549	-0.196877
107.76	0.17811	-0.243696
108	0.168278	-0.25453
108.24	0.199046	-0.192302
108.48	0.151631	-0.102605
108.72	0.136576	-0.112153
108.96	0.152834	-0.127705
109.2	0.0878655	-0.169356
109.44	0.0940841	-0.120344
109.68	0.147989	-0.174949
109.92	0.138195	-0.200693
110.16	0.213303	-0.153691
110.4	0.225901	-0.128316
110.64	0.290368	-0.0981902
110.88	0.337419	-0.140946
111.12	0.274633	-0.0428289
111.36	0.149836	-0.121113
111.6	0.176264	-0.135659
111.84	0.0640053	-0.143831
112.08	0.086349	-0.206493
112.32	0.132083	-0.259966
112.56	0.262952	-0.204484
112.8	0.246976	-0.245998
113.04	0.215024	-0.219537
113.28	0.18499	-0.21589
113.52	0.0764506	-0.100052
113.76	-0.0292138	-0.114285
114	-0.119065	0.0305399
114.24	-0.105188	0.0285725
114.48	0.0241909	-0.0437072
114.72	0.0250978	-0.0784438
114.96	0.0676671	-0.0961082
115.2	0.161697	-0.170849
115.44	0.0291732	-0.142305
115.68	0.0901689	-0.0933026
115.92	0.105338	-0.0625389
116.16	0.214306	0.00341352
116.4	0.252845	0.185073
116.64	0.264427	0.143432
116.88	0.200665	0.0604019
117.12	0.135397	-0.00377436
117.36	0.077471	-0.0898816
117.6	0.11253	-0.184027
117.84	0.175523	-0.170997
118.08	0.214821	-0.236232
118.32	0.204449	-0.226773
118.56	0.222906	-0.208936
118.8	0.139547	-0.143607
119.04	0.0279559	-0.195099
119.28	0.0825684	-0.240428
119.52	0.0262996	-0.309397
119.76	0.0343866	-0.295126
120	0.0679559	-0.291961
120.24	0.0982913	-0.229033
120.48	0.0376589	-0.173336
120.72	0.025884	-0.0196718
120.96	0.0697732	0.0554098
121.2	0.181391	0.00750301
121.44	0.19091	-0.0629026
121.68	0.256325	-0.118651
121.92	0.290258	-0.212329
122.16	0.276358	-0.288185
122.4	0.126587	-0.325056
122.64	0.116882	-0.294711
122.88	0.107336	-0.185117
123.12	0.0144407	-0.0646881
123.36	-0.055339	0.0684634
123.6	-0.0797671	-0.0426089
123.84	-0.0722628	0.00202517
124.08	-0.0625662	0.0421557
124.32	-0.0606697	0.0313958
124.56	0.00989134	-0.052772
124.8	0.0548783	-0.114372
125.04	-0.0156714	-0.206563
125.28	0.041313	-0.219775
125.52	0.0331247	-0.276428
125.76	0.0986134	-0.157687
126	0.101921	-0.188959
126.24	0.129709	-0.0892671
126.48	0.0606887	-0.0948
126.72	-0.0295493	-0.0443618
126.96	-0.102249	-0.112926
127.2	-0.150973	-0.202474
127.44	-0.234783	-0.232785
127.68	-0.0910853	-0.165802
127.92	-0.0109013	-0.206553
128.16	0.133171	-0.0545809
128.4	0.158668	-0.000212598
128.64	0.178655	0.106296
128.88	0.265874	0.107205
129.12	0.147157	0.121661
129.36	0.00216106	-0.00449324
129.6	0.0368061	-0.113109
129.84	-0.0263433	-0.0416345
130.08	-0.0249922	0.0204578
130.32	-0.0600489	-0.00773333
130.56	0.0152281	0.0280009
130.8	0.0839082	0.0850033
131.04	0.060287	0.109694
131.28	0.064787	0.0854377
131.52	0.100045	0.00322796
131.76	0.0317507	-0.099173
132	0.0464108	-0.191229
132.24	0.069958	-0.188231
132.48	0.1279	-0.316069
132.72	0.0769018	-0.418526
132.96	0.109204	-0.376684
133.2	0.0696286	-0.386559
133.44	0.0617931	-0.430316
133.68	0.104903	-0.373753
133.92	0.100459	-0.342401
134.16	0.111542	-0.295385
134.4	0.102232	-0.307716
134.64	0.0251433	-0.280793
134.88	-0.0516814	-0.276084
135.12	-0.0514238	-0.261259
135.36	0.025929	-0.0724709
135.6	0.0478493	-0.0483916
135.84	-0.0169839	-0.0989641
136.08	0.00576416	-0.0982499
136.32	0.00929835	-0.110935
136.56	-0.0532657	-0.149523
136.8	-0.156526	-0.172054
137.04	-0.104865	-0.177691
137.28	-0.054125	-0.171303
137.52	0.0131758	-0.176962
137.76	0.0024793	-0.0567804
138	-0.00086926	-0.0619086
138.24	0.0798364	-0.0727432
138.48	0.0856372	-0.0963618
138.72	0.0765463	-0.0971459
138.96	0.0195784	-0.125463
139.2	0.090416	-0.124353
139.44	0.15081	-0.258352
139.68	0.0284719	-0.296264
139.92	-0.100413	-0.368935
140.16	-0.123527	-0.313258
140.4	-0.159579	-0.241593
140.64	-0.128353	-0.263883
140.88	-0.10971	-0.38798
141.12	0.0333659	-0.352092
141.36	0.120526	-0.294913
141.6	0.105294	-0.366921
141.84	0.1266	-0.41452
142.08	0.135059	-0.37791
142.32	0.0753688	-0.341635
142.56	0.00869827	-0.223126
142.8	-0.0396762	-0.180147
143.04	0.0434472	-0.145868
143.28	-0.0550095	-0.226161
143.52	-0.0964255	-0.171984
143.76	-0.0454338	-0.0945016
144	-0.0333667	-0.156534
144.24	-0.0301394	-0.157211
144.48	-0.0171182	-0.15351
144.72	0.0208489	-0.0879487
144.96	0.0592277	-0.121632
145.2	-0.0899563	-0.242564
145.44	-0.0678242	-0.222867
145.68	-0.0564541	-0.271958
145.92	-0.0867879	-0.260536
146.16	0.0522511	-0.0919814
146.4	0.0685844	-0.00804196
146.64	0.0539394	0.0417249
146.88	-0.048597	0.0598834
147.12	-0.110841	-0.00163171
147.36	-0.0743805	-0.138858
147.6	-0.0448719	-0.309953
147.84	-0.114597	-0.305058
148.08	-0.0381377	-0.184289
148.32	-0.078458	-0.187273
148.56	-0.0739732	-0.0938825
148.8	-0.125596	-0.0242975
149.04	-0.134882	-0.0148429
149.28	-0.080168	-0.00106667
149.52	-0.0167308	-0.0665482
149.76	-0.06751	-0.1417
150	0.0173446	-0.0592802
150.24	0.0149143	-0.0198257
150.48	0.0320403	0.0483189
150.72	0.0267481	-0.054427
150.96	-0.0197502	-0.0650331
151.2	-0.0327999	-0.0644699
151.44	-0.0410519	-0.0985725
151.68	-0.127584	-0.111524
151.92	-0.0784623	-0.18006
152.16	-0.0539497	-0.1769
152.4	0.00800701	-0.143893
152.64	0.120053	-0.150956
152.88	0.0295339	-0.181015
153.12	0.000600089	-0.193412
153.36	0.00439654	-0.143351
153.6	-0.0566099	-0.0229315
153.84	-0.0861961	0.0185697
154.08	-0.0589965	-0.120736
154.32	-0.0273013	-0.136209
154.56	0.0422312	-0.12053
154.8	-0.0593273	-0.119738
155.04	-0.0667771	-0.107001
155.28	-0.0327472	-0.181984
155.52	-0.0365501	-0.163015
155.76	-0.0606372	-0.118269
156	-0.0772523	-0.00505271
156.24	0.0174906	-0.0738779
156.48	0.0647607	-0.215141
156.72	0.0503157	-0.202363
156.96	0.0221979	-0.182605
157.2	0.135992	-0.145729
157.44	0.13451	-0.189682
157.68	0.0939861	-0.225934
157.92	0.00802467	-0.19627
158.16	-0.030971	-0.215151
158.4	-0.186391	-0.252111
158.64	-0.221718	-0.263482
158.88	-0.255091	-0.297733
159.12	-0.168307	-0.249062
159.36	-0.110313	-0.20178
159.6	-0.0907139	-0.105724
159.84	-0.111816	-0.155206
160.08	-0.0644368	-0.166241
160.32	-0.165768	-0.0880131
160.56	-0.145601	-0.126861
160.8	-0.105519	-0.164525
161.04	-0.141934	-0.0850434
161.28	-0.0708243	-0.140857
161.52	-0.0364325	-0.138316
161.76	-0.0892355	-0.226698
162	-0.0341424	-0.205934
162.24	-0.115616	-0.249752
162.48	-0.0749086	-0.22468
162.72	-0.0304498	-0.200134
162.96	-0.0424909	-0.170265
163.2	-0.00923334	-0.107589
163.44	0.037674	0.0491012
163.68	-0.00771514	0.0986862
163.92	0.0114818	0.102873
164.16	0.0543714	0.0988401
164.4	0.0662783	0.0470312
164.64	0.0962935	0.0710359
164.88	0.0985009	-0.00161679
165.12	0.117146	-0.108922
165.36	0.0739901	-0.0952625
165.6	0.0176541	-0.129192
165.84	0.0268533	-0.147426
166.08	0.0690766	-0.0886014
166.32	0.0564749	-0.1464
166.56	0.0624965	-0.165906
166.8	0.10867	-0.172978
167.04	0.0936138	-0.104563
167.28	-0.00724069	-0.177631
167.52	-0.0613744	-0.187775
167.76	0.0156667	-0.13537
168	-0.0478532	-0.189844
168.24	-0.0859944	-0.16963
168.48	-0.145144	-0.168511
168.72	-0.125059	-0.208865
168.96	-0.175256	-0.104041
169.2	-0.16446	-0.0058303
169.44	-0.146229	-0.00297715
169.68	-0.0560216	-0.00313566
169.92	-0.0302554	0.0752559
170.16	0.143242	0.0912419
170.4	0.201056	0.00824894
170.64	0.177593	-0.0733884
170.88	0.164952	-0.365426
171.12	0.0887186	-0.395635
171.36	0.0425844	-0.36184
171.6	-0.117091	-0.308087
171.84	-0.0562338	-0.273188
172.08	0.000701722	-0.182768
172.32	0.0200156	-0.134204
172.56	-0.0369866	-0.0746984
172.8	-0.0917983	-0.119682
173.04	-0.133519	-0.212325
173.28	-0.146733	-0.357127
173.52	-0.227967	-0.241174
173.76	-0.134707	-0.276133
174	-0.143403	-0.183878
174.24	-0.0659316	-0.243841
174.48	-0.0388775	-0.254377
174.72	-0.0753641	-0.24896
174.96	-0.0876498	-0.2433
175.2	-0.0569225	-0.270078
175.44	0.0412091	-0.26426
175.68	0.122579	-0.248422
175.92	0.087629	-0.138688
176.16	0.0639965	-0.177956
176.4	-0.0461316	-0.115985
176.64	-0.129212	-0.229775
176.88	-0.207087	-0.222507
177.12	-0.201511	-0.231956
177.36	-0.180559	-0.244525
177.6	-0.138727	-0.206329
177.84	-0.146433	-0.194385
178.08	-0.122753	-0.154847
178.32	-0.178165	-0.0925539
178.56	-0.15571	-0.124298
178.8	-0.16695	-0.0991087
179.04	-0.121185	-0.162885
179.28	-0.0698216	-0.113622
179.52	-0.0340987	-0.14316
179.76	-0.00076971	-0.0889511
180	-0.00353984	-0.0880187
180.24	-0.0417493	-0.181645
180.48	-0.057481	-0.227957
180.72	-0.0565009	-0.285822
180.96	-0.0236805	-0.315962
181.2	0.0134229	-0.286186
181.44	-0.00782383	-0.24605
181.68	-0.0559537	-0.225906
181.92	-0.168633	-0.172955
182.16	-0.25629	-0.170018
182.4	-0.291147	-0.270871
182.64	-0.242836	-0.445538
182.88	-0.137814	-0.488974
183.12	-0.00143726	-0.491352
183.36	0.00253245	-0.439767
183.6	0.0205065	-0.443473
183.84	0.0564805	-0.330863
184.08	-0.0202766	-0.264522
184.32	-0.0430494	-0.134755
184.56	-0.0226359	-0.101842
184.8	-0.0781836	-0.123124
185.04	-0.0612463	-0.229137
185.28	-0.169742	-0.258625
185.52	-0.11245	-0.269557
185.76	-0.052971	-0.260699
186	-0.0253953	-0.348638
186.24	-0.069939	-0.250871
186.48	-0.0801225	-0.30123
186.72	-0.118906	-0.201207
186.96	-0.083707	-0.154018
187.2	-0.121716	-0.190516
187.44	-0.127084	-0.18039
187.68	-0.205975	-0.209826
187.92	-0.179019	-0.24246
188.16	-0.231407	-0.253723
188.4	-0.199046	-0.327649
188.64	-0.106305	-0.286838
188.88	-0.0246813	-0.386381
189.12	0.050975	-0.33116
189.36	0.077026	-0.341513
189.6	-0.0184804	-0.296258
189.84	0.0491698	-0.155784
190.08	0.0214403	-0.152227
190.32	-0.0409234	-0.0350378
190.56	-0.0723347	0.0401417
190.8	-0.123878	-0.0116998
191.04	-0.152127	-0.0757735
191.28	-0.10074	-0.162608
191.52	-0.140144	-0.191023
191.76	-0.0114039	-0.265937
192	-0.0401178	-0.301876
192.24	-0.01731	-0.286595
192.48	0.0281056	-0.267335
192.72	-0.058942	-0.107853
192.96	-0.101646	-0.0529343
193.2	-0.0857346	-0.043932
193.44	-0.113287	-0.102734
193.68	-0.144845	-0.125532
193.92	-0.282213	-0.124455
194.16	-0.264731	-0.210049
194.4	-0.182049	-0.257537
194.64	-0.13219	-0.277001
194.88	-0.059958	-0.364279
195.12	0.0421026	-0.384219
195.36	0.104172	-0.374219
195.6	0.0211848	-0.307739
195.84	-0.157867	-0.414709
196.08	-0.210737	-0.371865
196.32	-0.234039	-0.296503
196.56	-0.2913	-0.272484
196.8	-0.275736	-0.166558
197.04	-0.0937186	-0.100367
197.28	0.0207186	-0.179179
197.52	0.0172641	-0.183179
197.76	0.0108874	-0.187612
198	0.0476104	-0.166302
198.24	0.0103247	-0.283747
198.48	-0.0900433	-0.240507
198.72	-0.125268	-0.22812
198.96	-0.133593	-0.207496
199.2	-0.152049	-0.0910024
199.44	-0.193402	-0.0829138
199.68	-0.172608	-0.219371
199.92	-0.103701	-0.269091
200.16	-0.112249	-0.305105
200.4	-0.0746966	-0.326317
200.64	-0.193993	-0.45324
200.88	-0.319445	-0.440712
201.12	-0.296684	-0.337864
201.36	-0.226706	-0.246218
201.6	-0.193351	-0.146708
201.84	-0.155472	-0.187561
202.08	-0.0944585	-0.286307
202.32	0.0118467	-0.279076
202.56	-0.0737182	-0.206498
202.8	-0.064742	-0.30433
203.04	-0.0444282	-0.448516
203.28	-0.0497723	-0.405304
203.52	-0.0957004	-0.321399
203.76	-0.122276	-0.304382
204	-0.0379082	-0.263147
204.24	-0.0288632	-0.273486
204.48	-0.102168	-0.182316
204.72	-0.0655732	-0.0937707
204.96	-0.140415	-0.0722089
205.2	-0.265872	-0.235207
205.44	-0.257229	-0.368405
205.68	-0.289415	-0.422339
205.92	-0.247233	-0.43109
206.16	-0.224795	-0.532372
206.4	-0.200271	-0.429682
206.64	-0.138437	-0.322437
206.88	-0.0599141	-0.232331
207.12	-0.0413002	-0.0829371
207.36	0.0594898	-0.158218
207.6	-0.0444448	-0.226908
207.84	-0.00905472	-0.215099
208.08	0.0253517	-0.222232
208.32	-0.0512423	-0.215952
208.56	-0.0837216	-0.290386
208.8	-0.106609	-0.218423
209.04	-0.137587	-0.154726
209.28	-0.147024	-0.153095
209.52	-0.210444	-0.00921587
209.76	-0.0960653	-0.0834061
210	-0.0445471	-0.0597883
210.24	-0.1093	0.0046592
210.48	-0.0959904	0.0440205
210.72	-0.153948	0.015242
210.96	-0.163251	0.00433754
211.2	-0.209665	0.0988364
211.44	-0.185246	0.0462676
211.68	-0.104185	0.00329789
211.92	-0.0860641	0.0194844
212.16	-0.174428	-0.0474573
212.4	-0.200365	-0.127496
212.64	-0.235969	-0.134359
212.88	-0.185982	-0.22267
213.12	-0.163055	-0.282083
213.36	-0.141677	-0.250367
213.6	-0.0789451	-0.18398
213.84	-0.0324386	-0.207771
214.08	-0.170568	-0.164815
214.32	-0.203763	-0.116186
214.56	-0.206871	-0.108399
214.8	-0.168852	-0.055504
215.04	-0.195608	0.00172212
215.28	-0.182337	-0.103364
215.52	-0.0451256	-0.126279
215.76	0.00665799	-0.184186
216	0.0125454	-0.208843
216.24	0.0754805	-0.182186
216.48	0.0459783	-0.267443
216.72	-0.0906364	-0.226917
216.96	-0.174013	-0.168632
217.2	-0.203333	-0.143724
217.44	-0.136127	-0.149705
217.68	-0.181541	-0.24654
217.92	-0.0308632	-0.265113
218.16	0.0286801	-0.321719
218.4	-0.0217723	-0.319878
218.64	-0.112437	-0.383878
218.88	-0.181647	-0.313463
219.12	-0.235293	-0.241772
219.36	-0.194517	-0.225524
219.6	-0.189722	-0.171399
219.84	-0.0913	-0.155268
220.08	-0.00820046	-0.168858
220.32	-0.0196507	-0.232308
220.56	-0.0211875	-0.318835
220.8	-0.172642	-0.341981
221.04	-0.110395	-0.402378
221.28	-0.0420948	-0.351049
221.52	0.0150285	-0.394312
221.76	0.0114939	-0.383403
222	0.0122121	-0.291865
222.24	-0.0864676	-0.324685
222.48	-0.262991	-0.273054
222.72	-0.440481	-0.397739
222.96	-0.44339	-0.39006
223.2	-0.451649	-0.311151
223.44	-0.311945	-0.216055
223.68	-0.247532	-0.170204
223.92	-0.185084	-0.140684
224.16	-0.127186	-0.0794769
224.4	-0.159889	-0.0152765
224.64	-0.174843	-0.0234909
224.88	-0.161341	-0.0527916
225.12	-0.166848	-0.186605
225.36	-0.125305	-0.18569
225.6	-0.0647225	-0.117631
225.84	-0.0784303	-0.113701
226.08	-0.119398	-0.180321
226.32	-0.209746	-0.166792
226.56	-0.185034	-0.147636
226.8	-0.0909611	-0.201034
227.04	-0.163818	-0.306627
227.28	-0.216165	-0.367509
227.52	-0.142991	-0.3697
227.76	-0.214766	-0.360194
228	-0.329671	-0.291477
228.24	-0.355429	-0.292088
228.48	-0.15845	-0.257607
228.72	0.0216866	-0.142722
228.96	0.0926065	-0.1282
229.2	0.0135268	-0.233248
229.44	-0.00497534	-0.285841
229.68	-0.0768022	-0.308415
229.92	-0.216413	-0.334172
230.16	-0.272863	-0.376177
230.4	-0.231014	-0.45338
230.64	-0.201762	-0.453636
230.88	-0.198582	-0.399021
231.12	-0.28793	-0.230606
231.36	-0.220784	-0.188392
231.6	-0.195991	-0.192587
231.84	-0.156965	-0.254266
232.08	-0.0619654	-0.336154
232.32	-0.0972381	-0.377156
232.56	-0.142173	-0.470793
232.8	-0.228766	-0.553846
233.04	-0.24187	-0.534382
233.28	-0.241836	-0.464243
233.52	-0.264208	-0.34331
233.76	-0.265268	-0.365734
234	-0.133541	-0.362657
234.24	-0.0502875	-0.402145
234.48	-0.0503416	-0.471212
234.72	0.0247818	-0.500723
234.96	0.0766541	-0.514522
235.2	0.0161238	-0.498125
235.44	0.0193554	-0.440848
235.68	-0.0307507	-0.335426
235.92	0.0211173	-0.228829
236.16	0.00341168	-0.206046
236.4	-0.0704346	-0.187332
236.64	-0.0734628	-0.257351
236.88	-0.183516	-0.379751
237.12	-0.243079	-0.369793
237.36	-0.155759	-0.344945
237.6	-0.183897	-0.36707
237.84	-0.178564	-0.37501
238.08	-0.269285	-0.357551
238.32	-0.24186	-0.227182
238.56	-0.251927	-0.156609
238.8	-0.290569	-0.15618
239.04	-0.13678	-0.220174
239.28	-0.124171	-0.220613
239.52	-0.122271	-0.108357
239.76	0.00698406	-0.0186368
240	-0.000209437	-0.00472542
240.24	0.0693229	-0.0804923
240.48	0.0849528	-0.10164
240.72	-0.032716	-0.0221623
240.96	-0.0559303	-0.11144
241.2	-0.246859	-0.19509
241.44	-0.349536	-0.30351
241.68	-0.21579	-0.402727
241.92	-0.268515	-0.389674
242.16	-0.194528	-0.307622
242.4	-0.211684	-0.334382
242.64	-0.21716	-0.375641
242.88	-0.230688	-0.30655
243.12	-0.335745	-0.233007
243.36	-0.321545	-0.356144
243.6	-0.226359	-0.36213
243.84	-0.288156	-0.344377
244.08	-0.281965	-0.399691
244.32	-0.274628	-0.341757
244.56	-0.233416	-0.301704
244.8	-0.257337	-0.294749
245.04	-0.262257	-0.274151
245.28	-0.130523	-0.158552
245.52	-0.0736901	-0.138276
245.76	-0.0660299	-0.174131
246	-0.165911	-0.0789856
246.24	-0.121779	0.0163385
246.48	-0.206833	-0.00217904
246.72	-0.23661	-0.0334424
246.96	-0.290331	-0.137335
247.2	-0.223756	-0.125317
247.44	-0.25667	-0.142362
247.68	-0.277197	-0.126092
247.92	-0.332178	-0.131971
248.16	-0.233699	-0.155268
248.4	-0.25025	-0.0702564
248.64	-0.187618	-0.00958045
248.88	-0.223032	-0.0477623
249.12	-0.174199	-0.184779
249.36	-0.257589	-0.275781
249.6	-0.202372	-0.271678
249.84	-0.203004	-0.302611
250.08	-0.133378	-0.289347
250.32	-0.0663979	-0.264802
250.56	-0.0300624	-0.270653
250.8	-0.0140256	-0.192564
251.04	-0.131417	-0.217612
251.28	-0.247614	-0.239262
251.52	-0.213101	-0.28461
251.76	-0.210394	-0.238223
252	-0.134537	-0.294554
252.24	-0.0369697	-0.334955
252.48	-0.056052	-0.321943
252.72	0.0683636	-0.227267
252.96	0.0167186	-0.194889
253.2	-0.0848918	-0.230521
253.44	-0.165584	-0.284605
253.68	-0.156913	-0.263054
253.92	-0.202247	-0.253776
254.16	-0.187991	-0.222308
254.4	-0.319507	-0.293333
254.64	-0.232545	-0.314988
254.88	-0.26919	-0.215571
255.12	-0.387091	-0.156853
255.36	-0.468468	-0.162448
255.6	-0.348476	-0.251725
255.84	-0.262091	-0.285804
256.08	-0.140814	-0.287692
256.32	-0.217243	-0.351375
256.56	-0.216052	-0.359534
256.8	-0.28929	-0.462284
257.04	-0.346273	-0.548695
257.28	-0.329714	-0.506643
257.52	-0.245775	-0.605198
257.76	-0.123199	-0.556527
258	-0.0934935	-0.488159
258.24	-0.123667	-0.352564
258.48	-0.111113	-0.256504
258.72	-0.170939	-0.20641
258.96	-0.192074	-0.135291
259.2	-0.246649	-0.233473
259.44	-0.320459	-0.237752
259.68	-0.343325	-0.168423
259.92	-0.372351	-0.185799
260.16	-0.391043	-0.214423
260.4	-0.335586	-0.182106
260.64	-0.236304	-0.0464466
260.88	-0.168616	-0.0664886
261.12	-0.178235	-0.0391553
261.36	-0.159534	-0.0134443
261.6	-0.172252	-0.0998919
261.84	-0.212162	-0.136423
262.08	-0.20614	-0.166796
262.32	-0.204878	-0.233925
262.56	-0.0918875	-0.32433
262.8	-0.0436191	-0.33405
263.04	-0.0518442	-0.233855
263.28	-0.117515	-0.282624
263.52	-0.193013	-0.313925
263.76	-0.284141	-0.361789
264	-0.25918	-0.47447
264.24	-0.223241	-0.538353
264.48	-0.177222	-0.528824
264.72	-0.0806082	-0.406853
264.96	-0.0472095	-0.291562
265.2	0.00541087	-0.297739
265.44	-0.0749593	-0.2131
265.68	-0.144376	-0.171981
265.92	-0.177506	-0.280689
266.16	-0.231252	-0.290218
266.4	-0.282616	-0.376091
266.64	-0.272666	-0.33907
266.88	-0.260387	-0.322381
267.12	-0.179424	-0.308329
267.36	-0.31385	-0.321066
267.6	-0.296787	-0.408003
267.84	-0.177015	-0.487066
268.08	-0.20248	-0.5159
268.32	-0.0876641	-0.564972
268.56	-0.0466143	-0.541524
268.8	-0.0524996	-0.514395
269.04	-0.0207269	-0.329417
269.28	-0.145357	-0.290816
269.52	-0.172155	-0.290979
269.76	-0.155941	-0.279277
270	-0.256718	-0.285175
270.24	-0.226498	-0.333823
270.48	-0.214766	-0.280257
270.72	-0.219095	-0.246387
270.96	-0.237199	-0.229883
271.2	-0.315792	-0.112681
271.44	-0.308758	-0.0788112
271.68	-0.346225	-0.190163
271.92	-0.39326	-0.321225
272.16	-0.387017	-0.348517
272.4	-0.321556	-0.344493
272.64	-0.249554	-0.408293
272.88	-0.254906	-0.416722
273.12	-0.229562	-0.477589
273.36	-0.181313	-0.346838
273.6	-0.194623	-0.251556
273.84	-0.212216	-0.253118
274.08	-0.120198	-0.25185
274.32	-0.0815862	-0.266936
274.56	-0.106277	-0.295315
274.8	-0.114088	-0.362494
275.04	-0.201909	-0.557156
275.28	-0.273513	-0.597296
275.52	-0.322969	-0.58331
275.76	-0.218225	-0.437646
276	-0.122718	-0.396667
276.24	-0.105699	-0.332191
276.48	-0.0723546	-0.26014
276.72	-0.0394477	-0.333043
276.96	-0.201917	-0.376955
277.2	-0.32172	-0.300484
277.44	-0.309125	-0.434423
277.68	-0.262404	-0.432456
277.92	-0.275411	-0.459477
278.16	-0.202411	-0.524158
278.4	-0.0557446	-0.593911
278.64	-0.0345455	-0.674214
278.88	-0.052013	-0.664227
279.12	-0.062684	-0.687239
279.36	-0.00847188	-0.579277
279.6	-0.0454416	-0.439231
279.84	-0.0737619	-0.514266
		-0.468718
		-0.517762
		-0.551865
		-0.575268
		-0.559371
		-0.444476
		-0.446224
		-0.466434
		-0.535408
		-0.577249
		-0.584056
		-0.532751
		-0.604033
		-0.542727
		-0.484476
		-0.425944
		-0.420699
		-0.428881
		-0.495245
		-0.499138
		-0.521155
		-0.3922
		-0.447663
		-0.456242
		-0.35847
		-0.291365
		-0.236349
		-0.292502
		-0.311308
		-0.354175
		-0.359378
		-0.307607
		-0.274535
		-0.289076
		-0.219901
		-0.168806
		-0.152736
		-0.220852
		-0.193263
		-0.221329
		-0.221469
		-0.235175
